# Supplementary material
Source: publisher figshare collection journal article supplement (https://karger.figshare.com/articles/dataset/_/5121733)
Supplement: Supplementary file 1 [file 1]

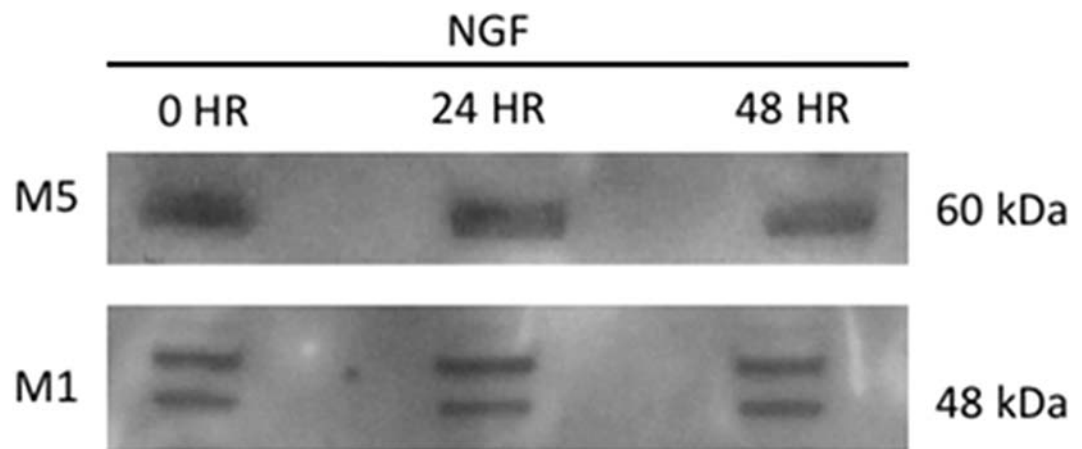

Supplemental Figure 1: M1 and M5 muscarinic receptor expression is constant across NGF stimulation time points. Western blot of M1 and M5 receptors from PC12 cells 0, 24, and 48 h after NGF stimulation. Expression of both proteins is identical at each time point. The two bands present in blots of M1 are likely due to a glycosylation event [50, 51].
